# Supplementary material
Source: ML conference proceedings conference paper supplement (https://openreview.net/forum?id=hvcWwAqdGs)
Supplement: supplementary_material [file attachment]

GELU,steps=1500

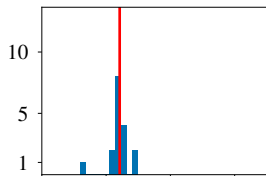

ReLU, steps=1500

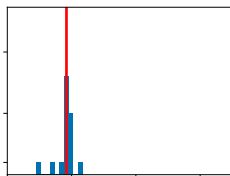

SiLU, steps=1500

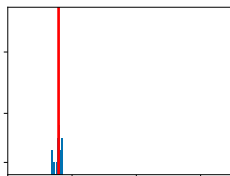

tanh,steps=1500

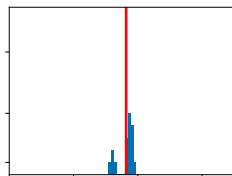

GELU,steps=200

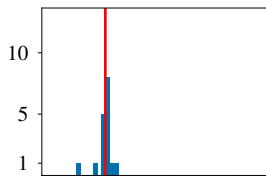

ReLU,steps=200

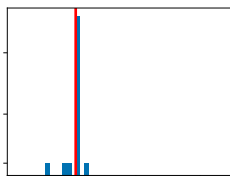

SiLU, steps=200

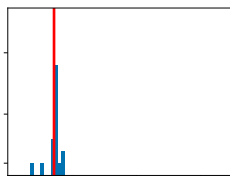

tanh,steps=200

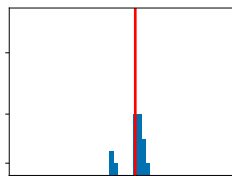

GELU,steps=100

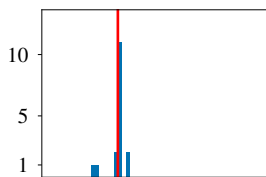

ReLU,steps=100

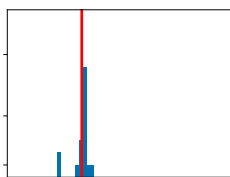

SiLU, steps=100

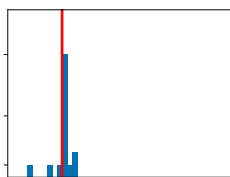

tanh, steps=100

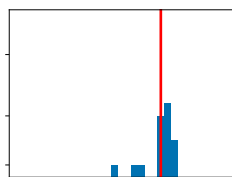

## Correlation counts

Correlations (with one dataset removed)
