# Supplementary material
Source: ML conference proceedings conference paper supplement (https://openreview.net/forum?id=hvcWwAqdGs)
Supplement: supplementary_material [file attachment]

Output Y

sin, Depth=16

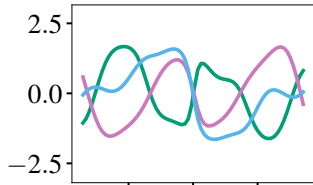

sin, Depth=32

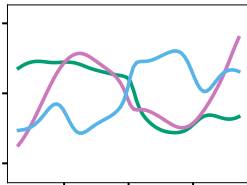

sin, Depth=256

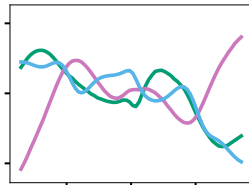

sin, Depth=512

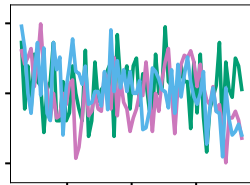

Output Y

ReLU, Depth=16

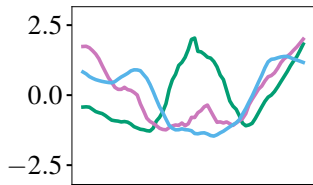

ReLU, Depth=32

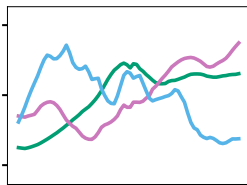

ReLU, Depth=256

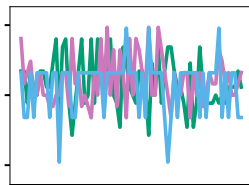

ReLU, Depth=512

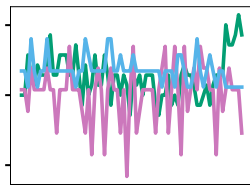

Input X

Input X

Input X

Input X
