# Supplementary material
Source: ML conference proceedings conference paper supplement (https://openreview.net/forum?id=hvcWwAqdGs)
Supplement: supplementary_material [file attachment]

Generalization gap

autmpg

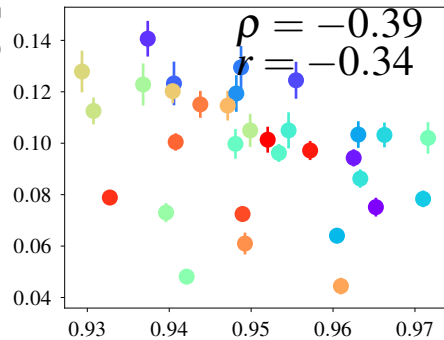

protein

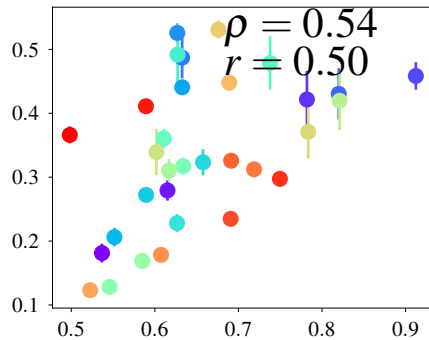

pendulum

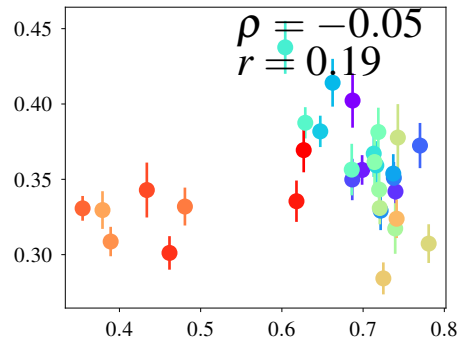

song

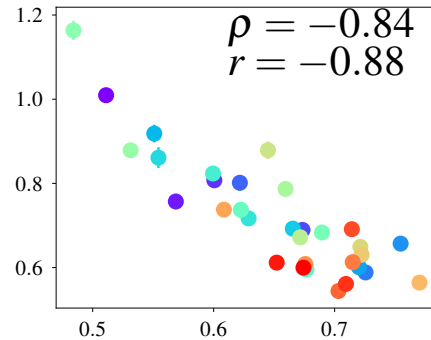

pumadyn32nm

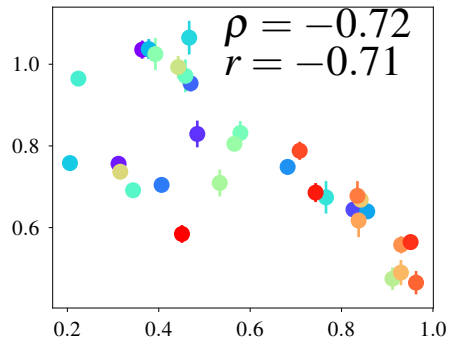

kin40k

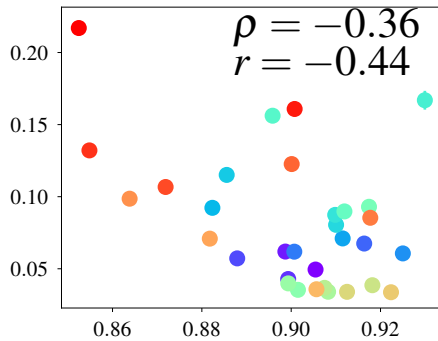

airfoil

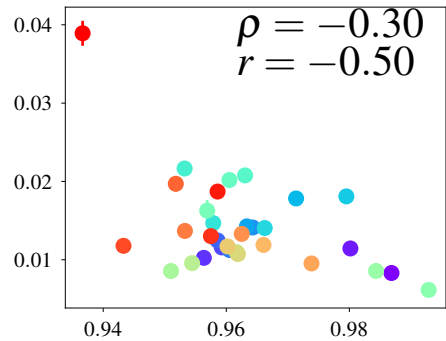

Lengthscale correlation

Lengthscale correlation

Lengthscale correlation
