# Supplementary material
Source: ML conference proceedings conference paper supplement (https://openreview.net/forum?id=hvcWwAqdGs)

Iteration 100

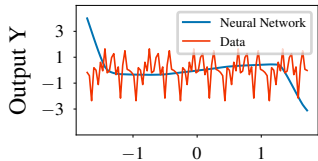

Iteration 1000

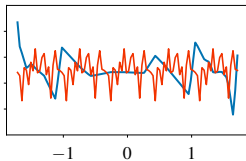

Iteration 14999

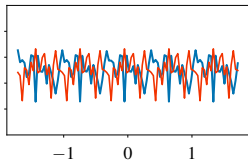

Input X

Covariance

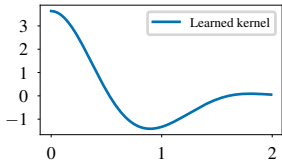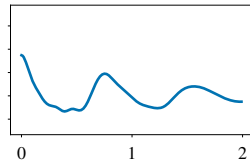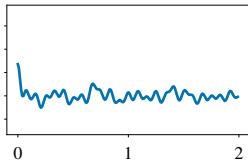Distance between points  $\tau$

Supplement: supplementary_material [file attachment]

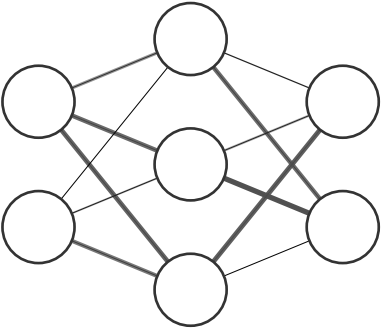

Supplement: supplementary_material [file attachment]

sin, Depth=16

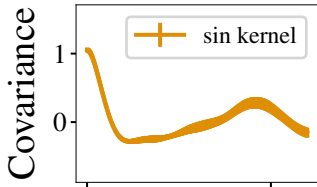

sin, Depth=32

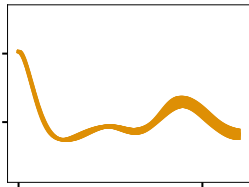

sin, Depth=256

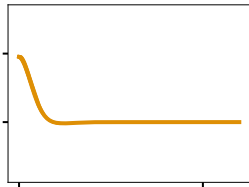

sin, Depth=512

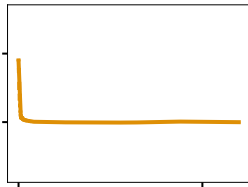

ReLU, Depth=16

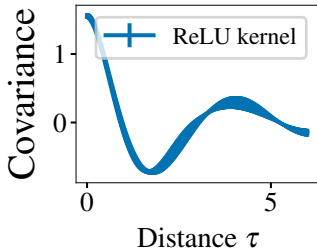

ReLU, Depth=32

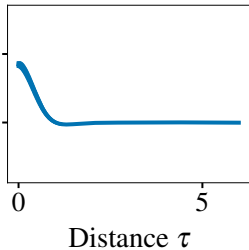

ReLU, Depth=256

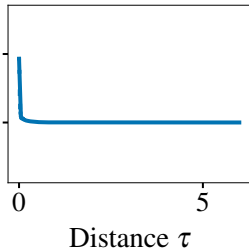

ReLU, Depth=512

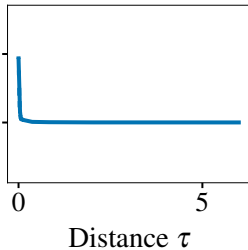

Supplement: supplementary_material [file attachment]

Generalization gap

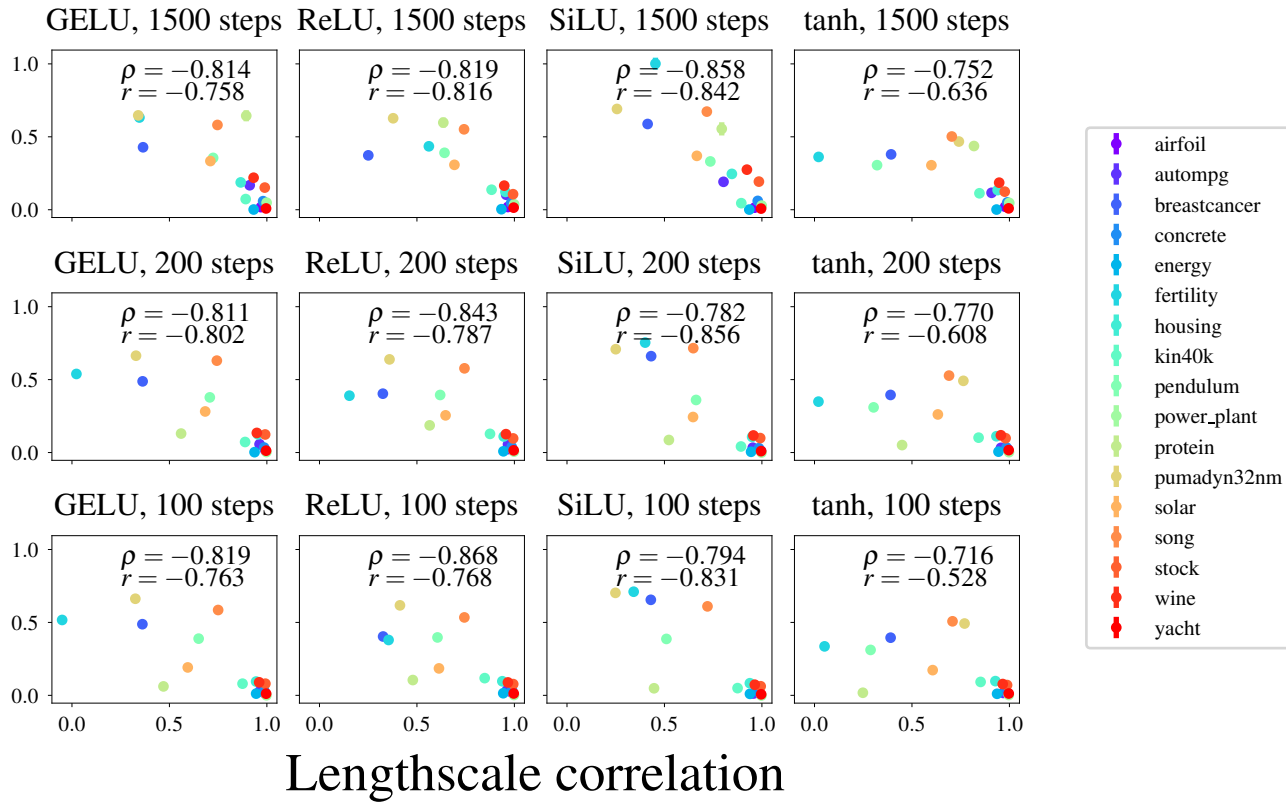

Supplement: supplementary_material [file attachment]

gradient descent w/Adam,  $\eta = 0.003$

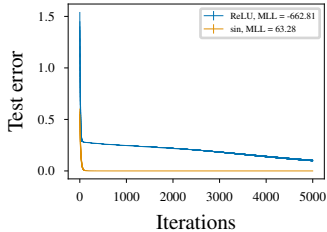

gradient descent w/Adam,  $\eta = 0.0003$

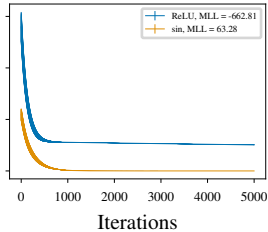

vanilla gradient descent,  $\eta = 0.01$

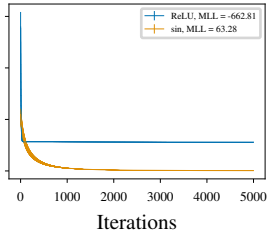

Supplement: supplementary_material [file attachment]

Test error

autompg

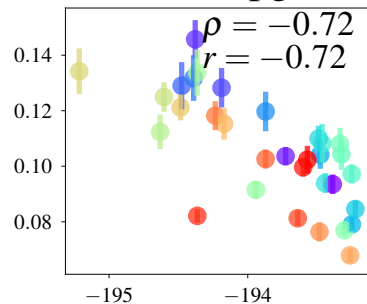

MLL

pumadyn32nm

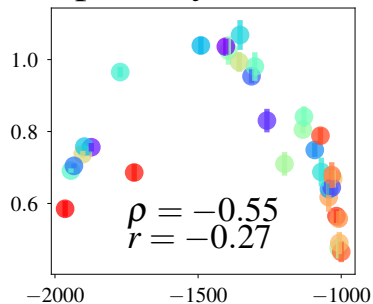

protein

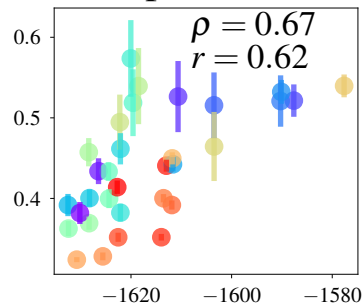

kin40k

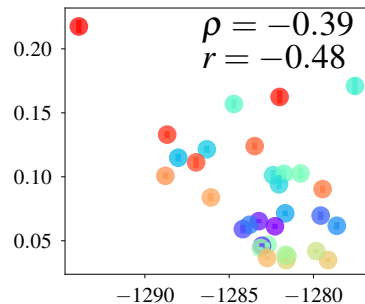

MLL

pendulum

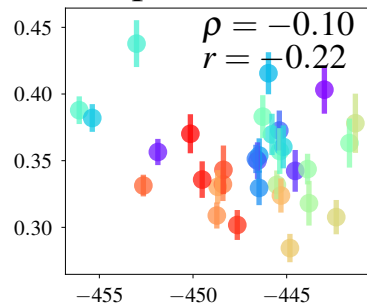

LML

airfoil

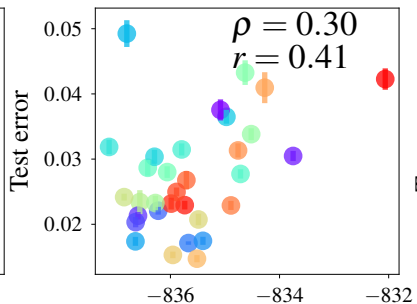

LML

song

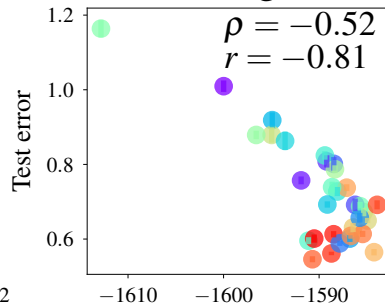

LML

Supplement: supplementary_material [file attachment]

# Performance Compared

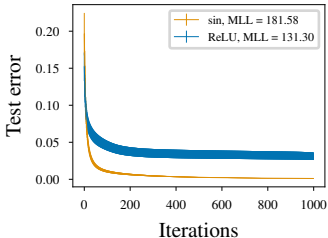

# Kernels Compared

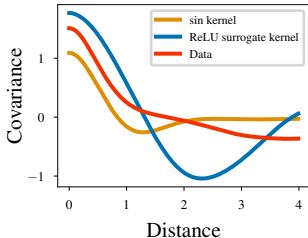

Supplement: supplementary_material [file attachment]

airfoil dataset, generalization gap = 0.0177

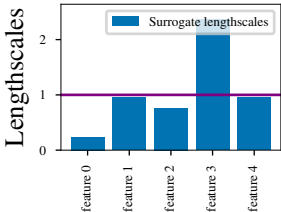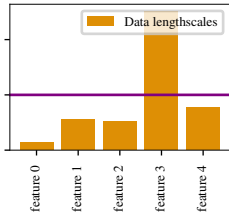

Supplement: supplementary_material [file attachment]

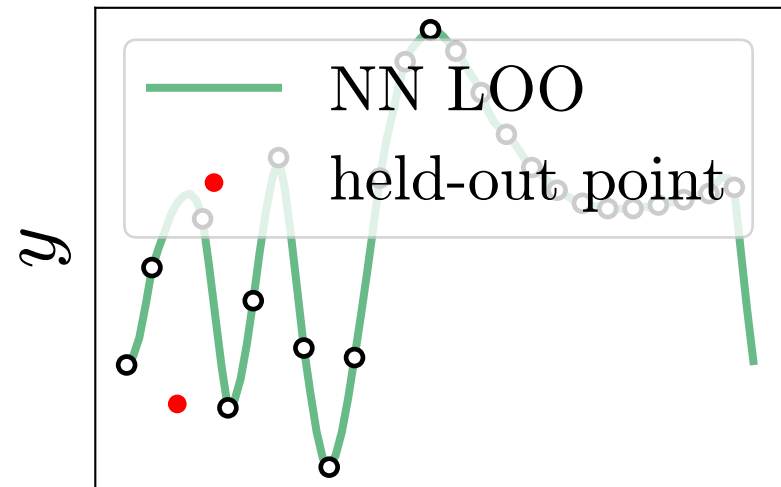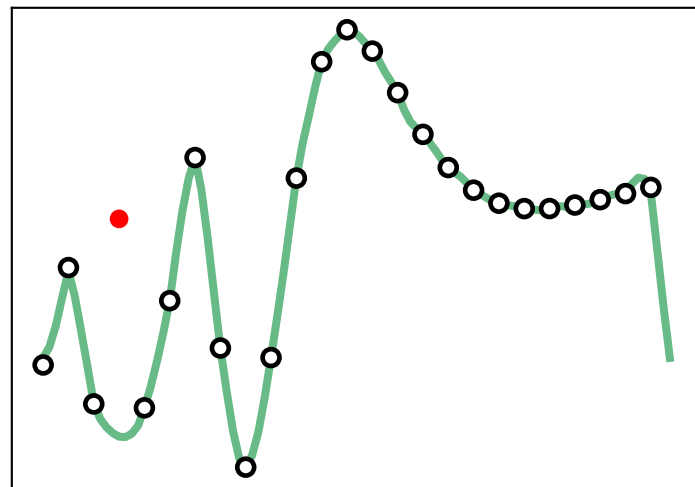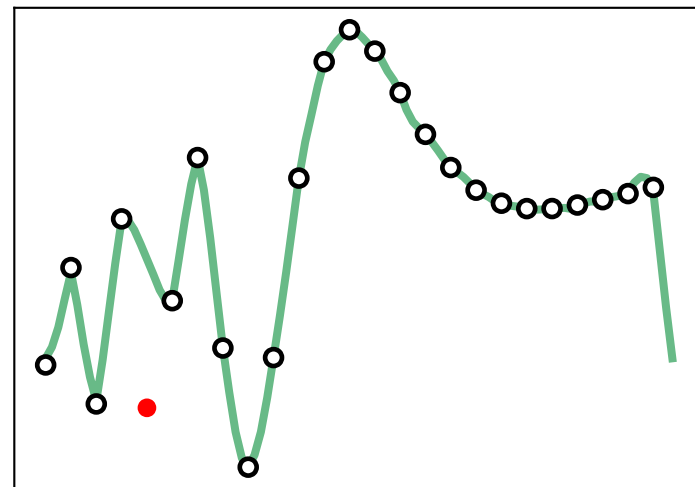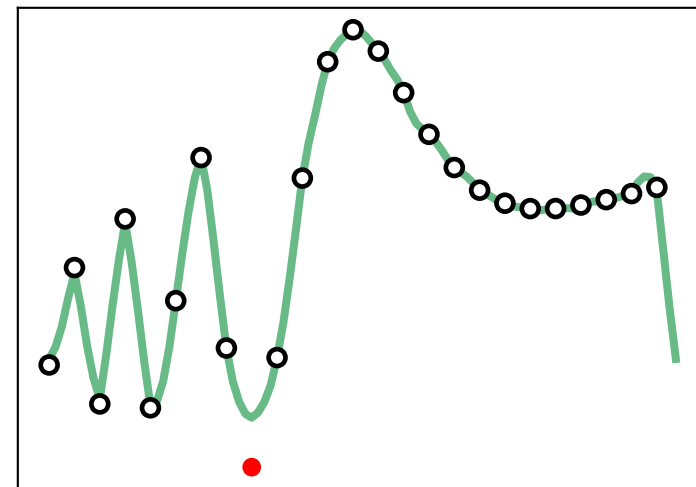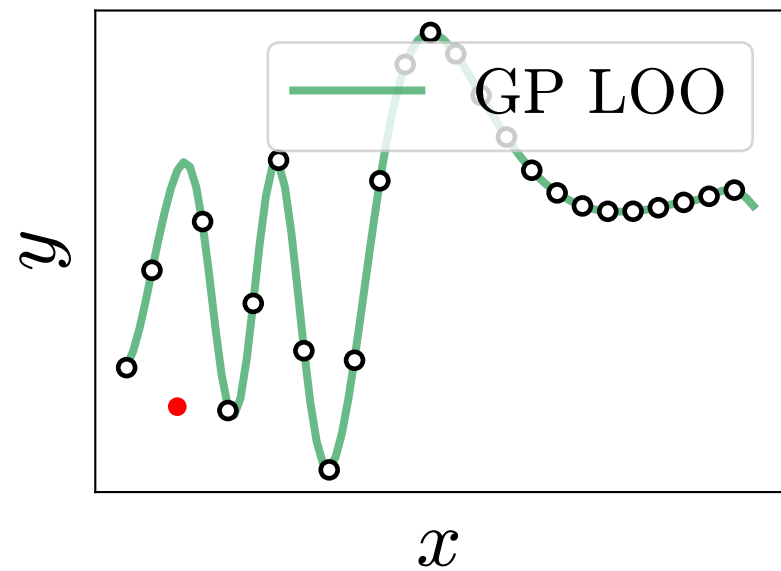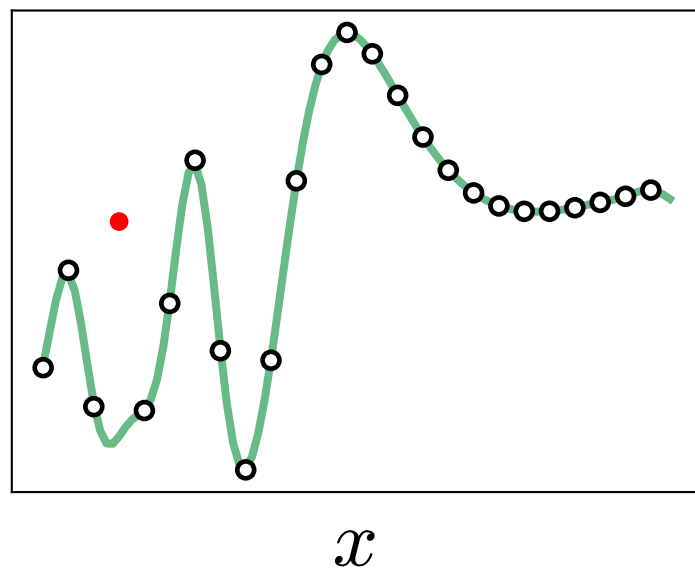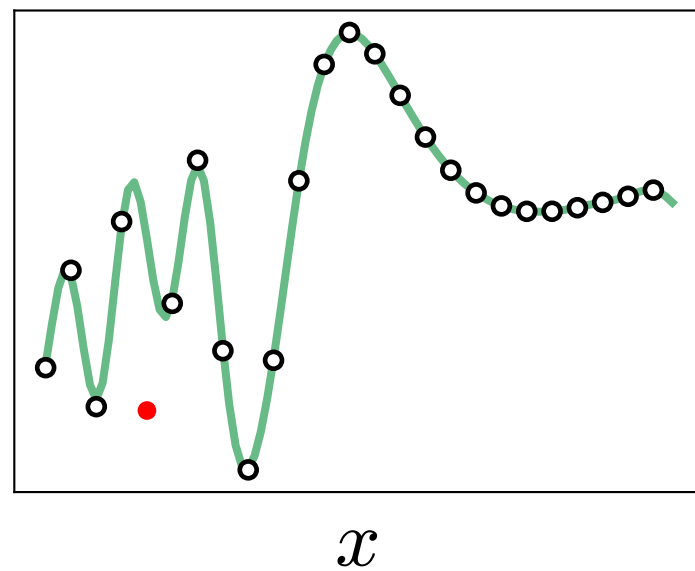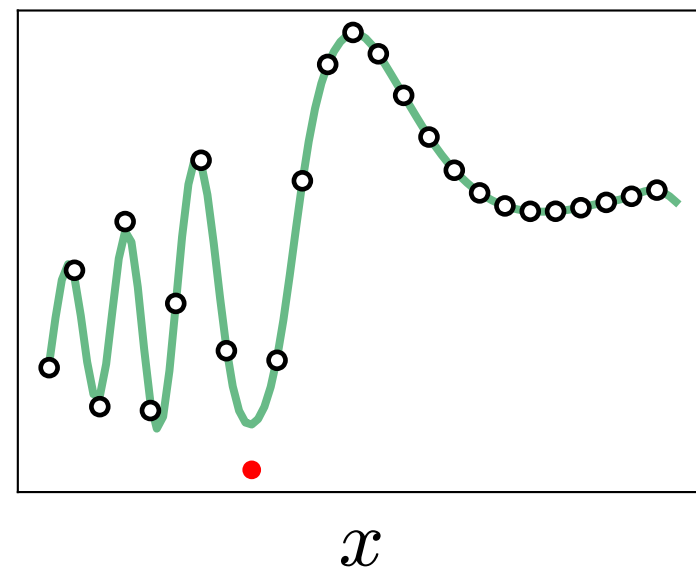

Supplement: supplementary_material [file attachment]

$\ell = 0.1, \nu = 0.5$

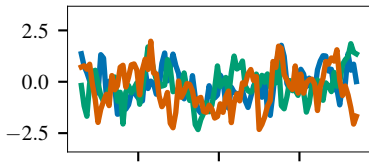

$\ell = 0.5, \nu = 0.5$

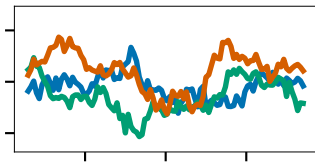

$\ell = 2.0, \nu = 0.5$

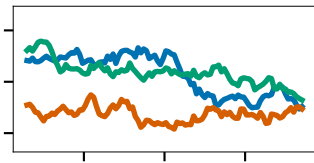

$\ell = 0.1, \nu = 1.5$

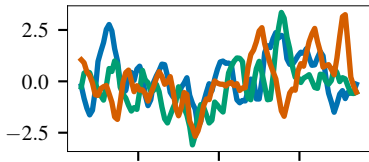

$\ell = 0.5, \nu = 1.5$

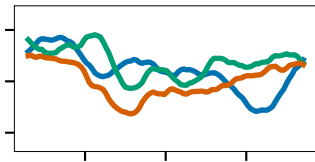

$\ell = 2.0, \nu = 1.5$

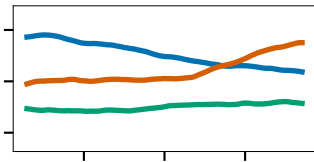

$\ell = 0.1, \nu = 2.5$

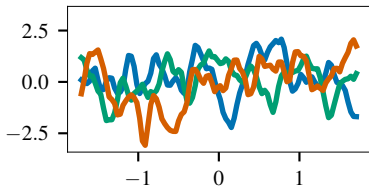

$\ell = 0.5, \nu = 2.5$

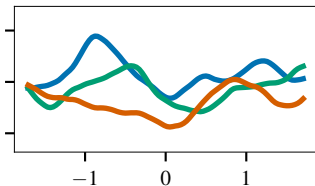

$\ell = 2.0, \nu = 2.5$

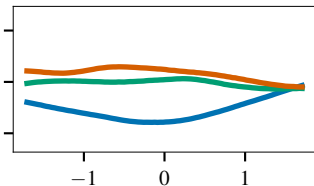

Supplement: supplementary_material [file attachment]

# NN samples

ReLU, Depth=16

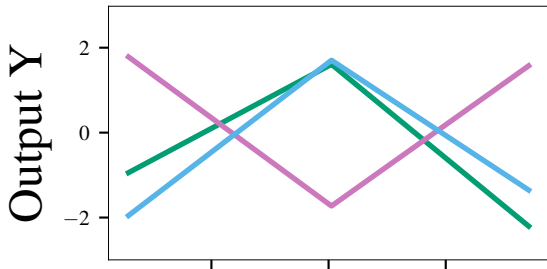

ReLU, Depth=32

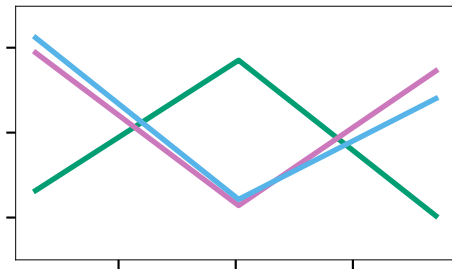

sin, Depth=16

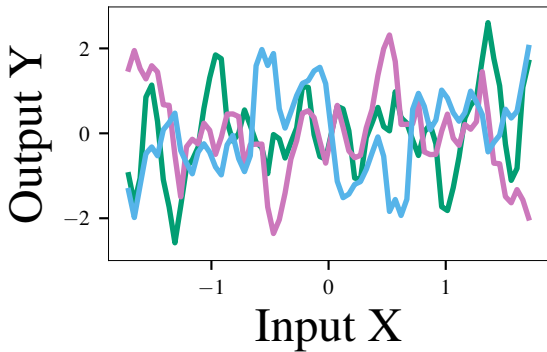

sin, Depth=32

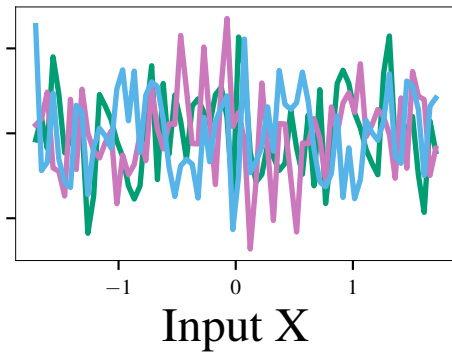

Supplement: supplementary_material [file attachment]

wine dataset, generalization gap = 0.219

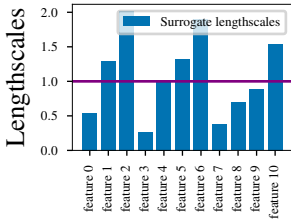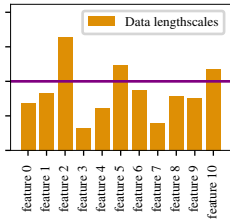

Supplement: supplementary_material [file attachment]

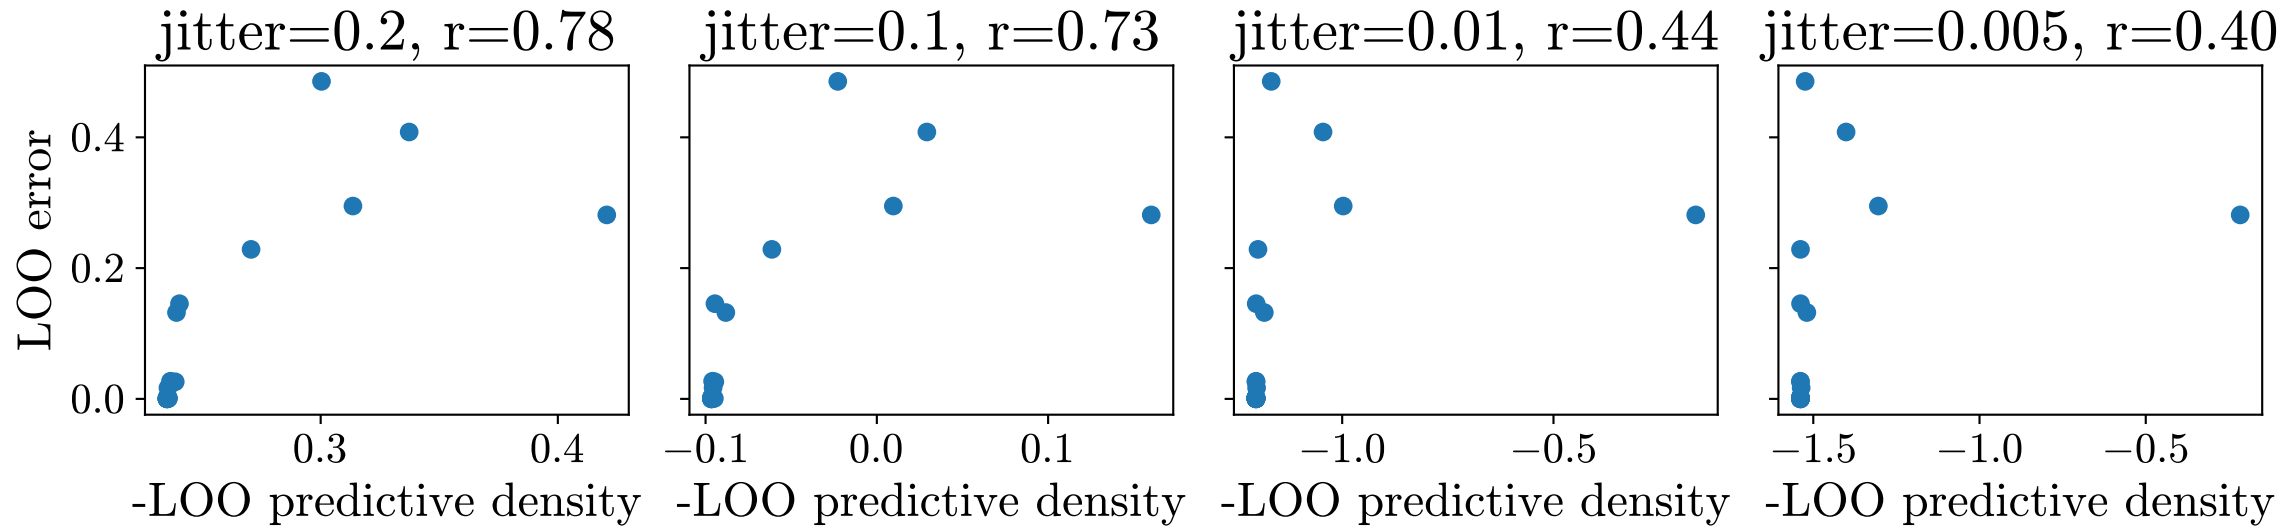

Supplement: supplementary_material [file attachment]

gradient descent w/Adam,  $\eta = 0.003$

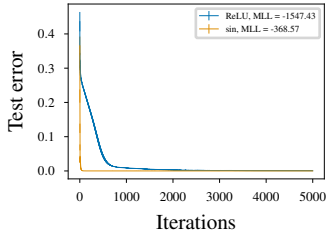

gradient descent w/Adam,  $\eta = 0.0003$

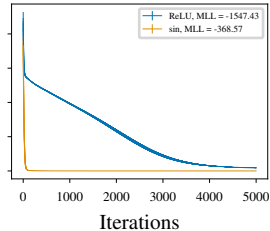

vanilla gradient descent,  $\eta = 0.01$

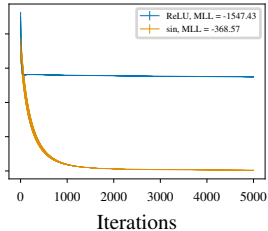

Supplement: supplementary_material [file attachment]

# Performance Compared

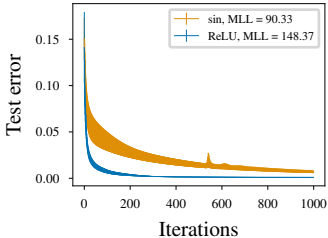

# Kernels Compared

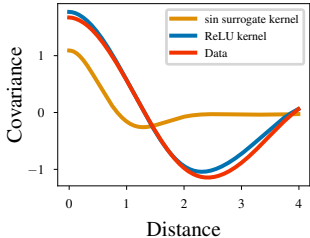

Supplement: supplementary_material [file attachment]

kin40k,  $r = -0.44$ 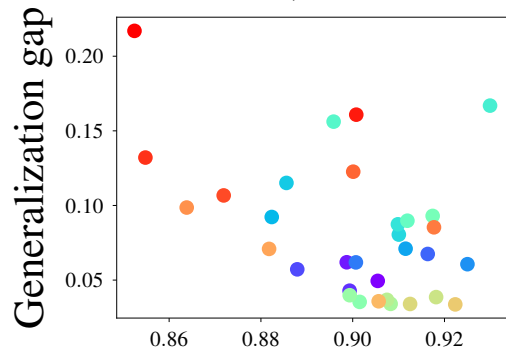airfoil,  $r = -0.50$ 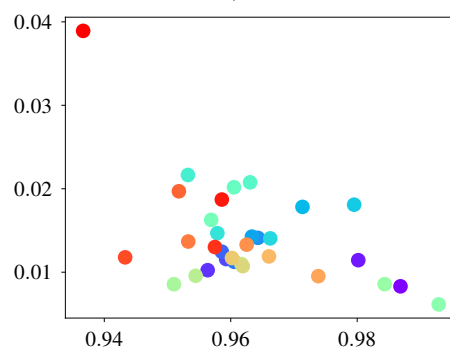pumadyn32nm,  $r = -0.71$ 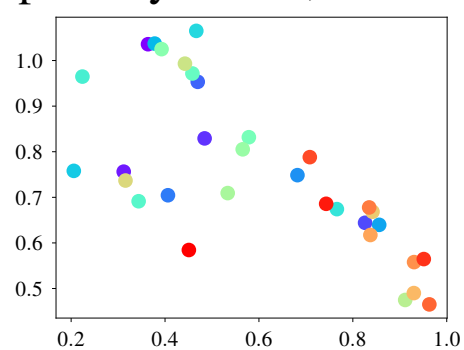song,  $r = -0.88$ 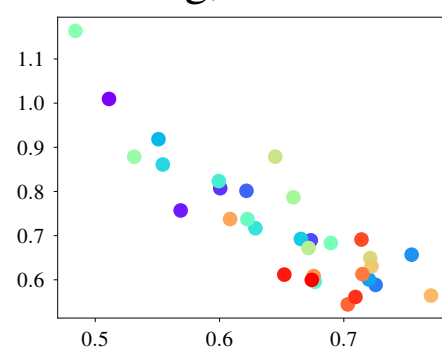autompg,  $r = -0.34$ 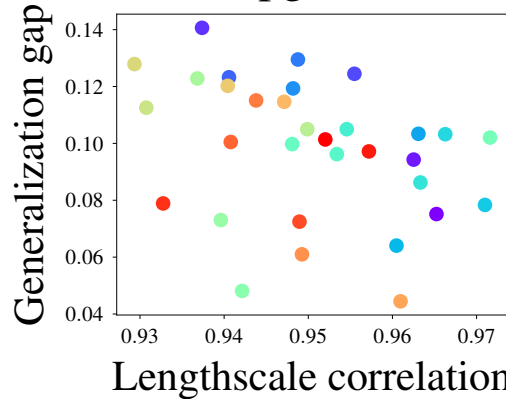protein,  $r = 0.50$ 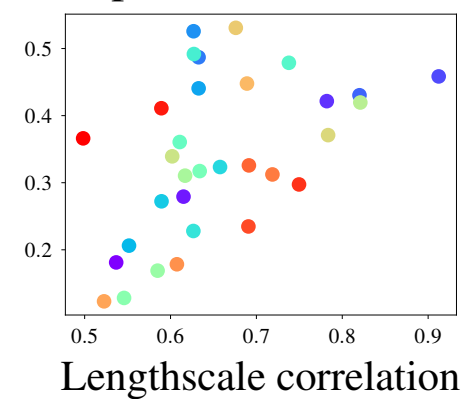pendulum,  $r = 0.19$ 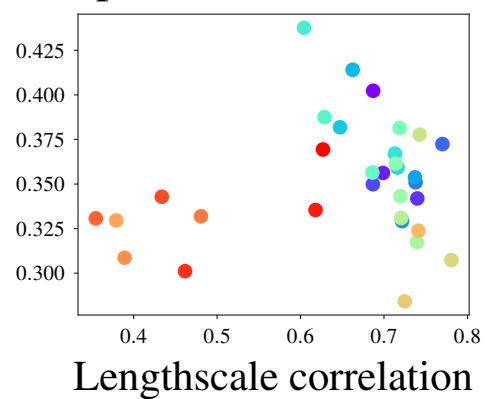

Supplement: supplementary_material [file attachment]

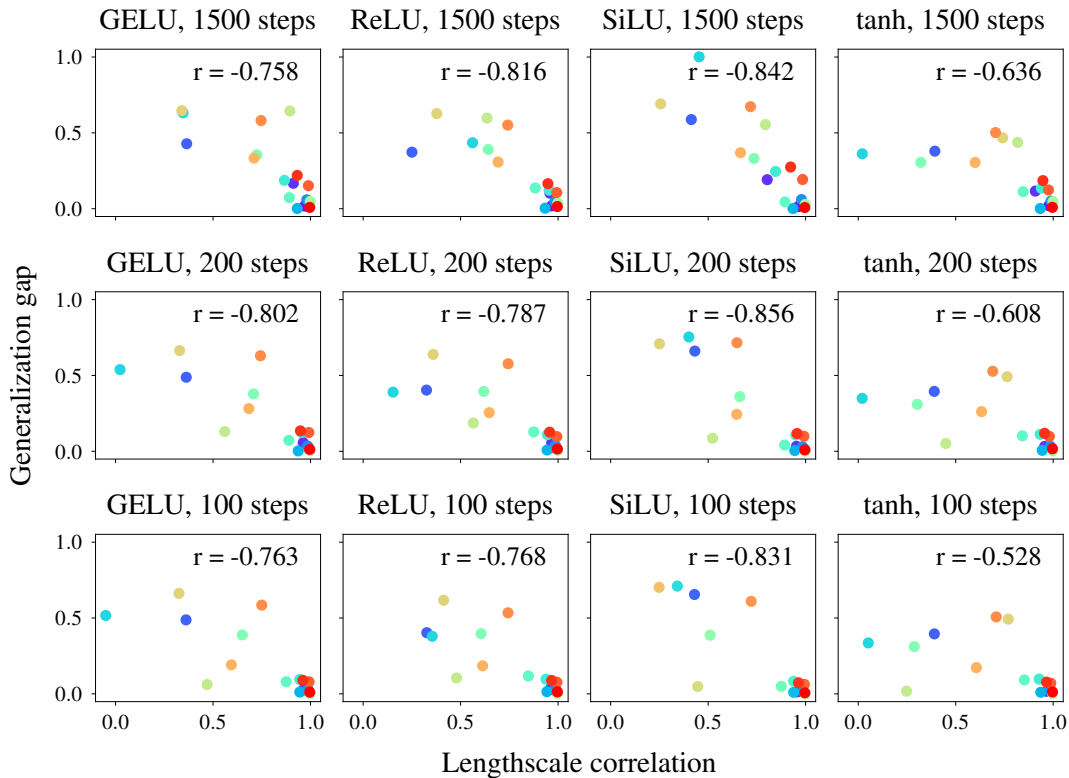

Supplement: supplementary_material [file attachment]

$\omega = 0.1$ 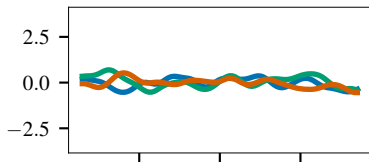 $\omega = 0.5$ 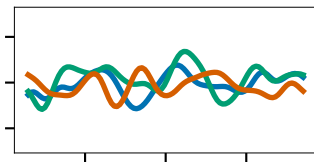 $\omega = 2.0$ 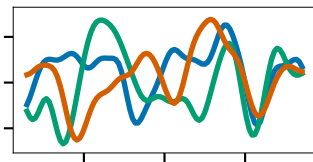 $\tau = 0.1$ 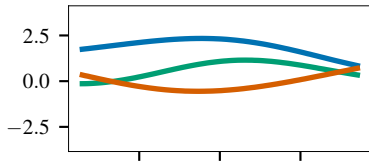 $\tau = 0.5$ 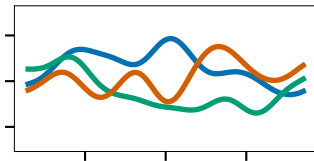 $\tau = 2.0$ 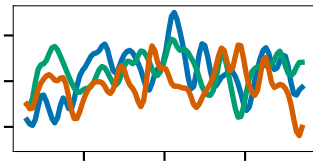 $\mu = 0.1$ 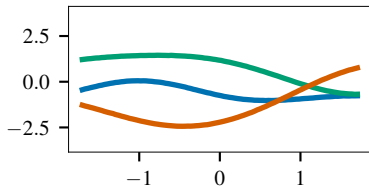 $\mu = 1.0$ 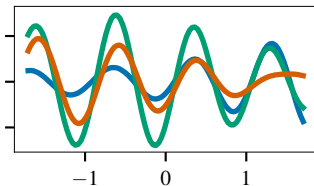 $\mu = 2.5$ 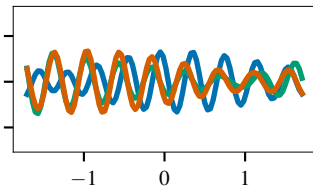

Supplement: supplementary_material [file attachment]

solar dataset, generalization gap = 0.334

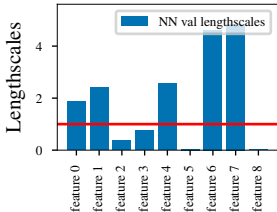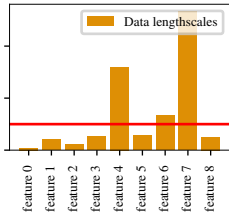

Supplement: supplementary_material [file attachment]

Iteration 0

Iteration 100

Iteration 1000

Iteration 10000

Iteration 14999

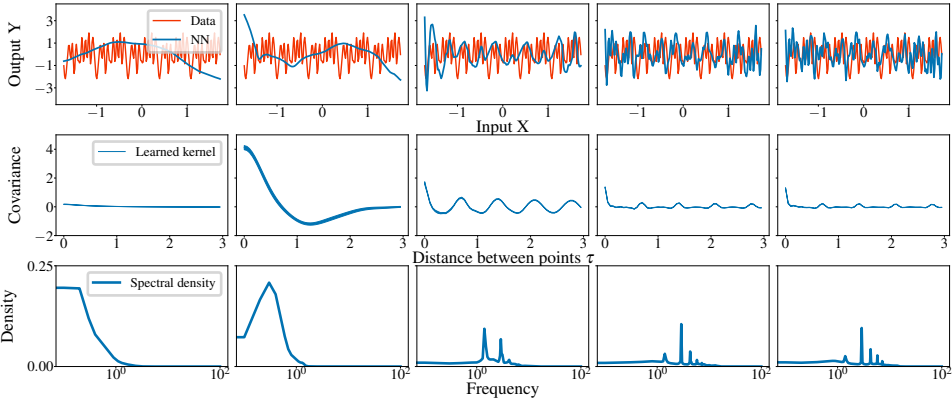

Supplement: supplementary_material [file attachment]

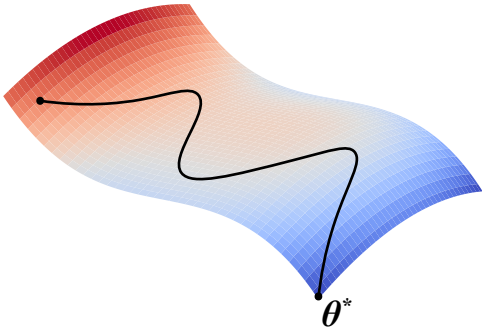

Supplement: supplementary_material [file attachment]

# GP samples

ReLU, Depth=16

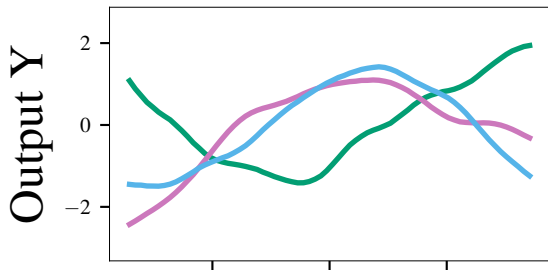

ReLU, Depth=32

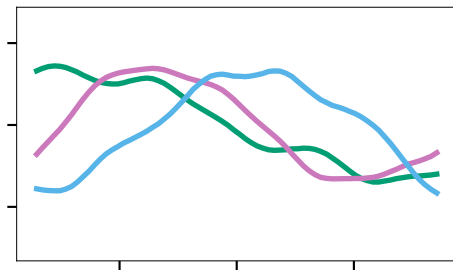

sin, Depth=16

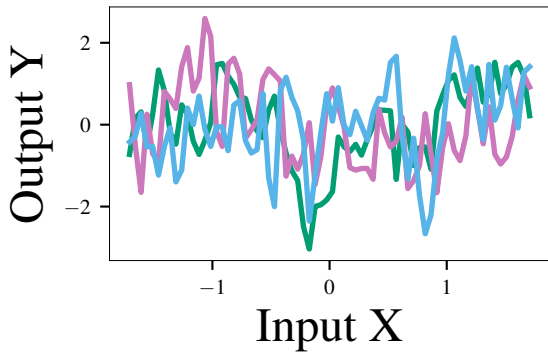

sin, Depth=32

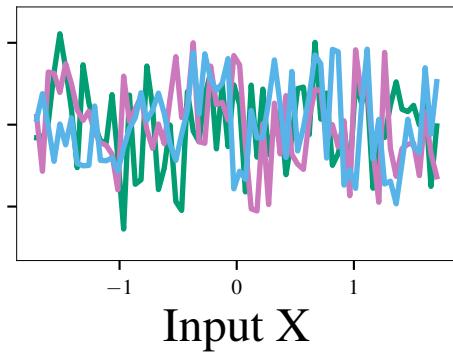

Supplement: supplementary_material [file attachment]

$\eta = 0.01$

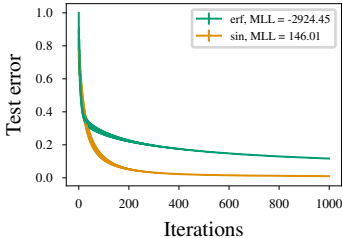

$\eta = 0.1$

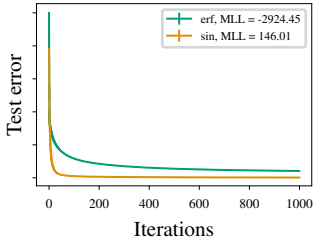

Supplement: supplementary_material [file attachment]

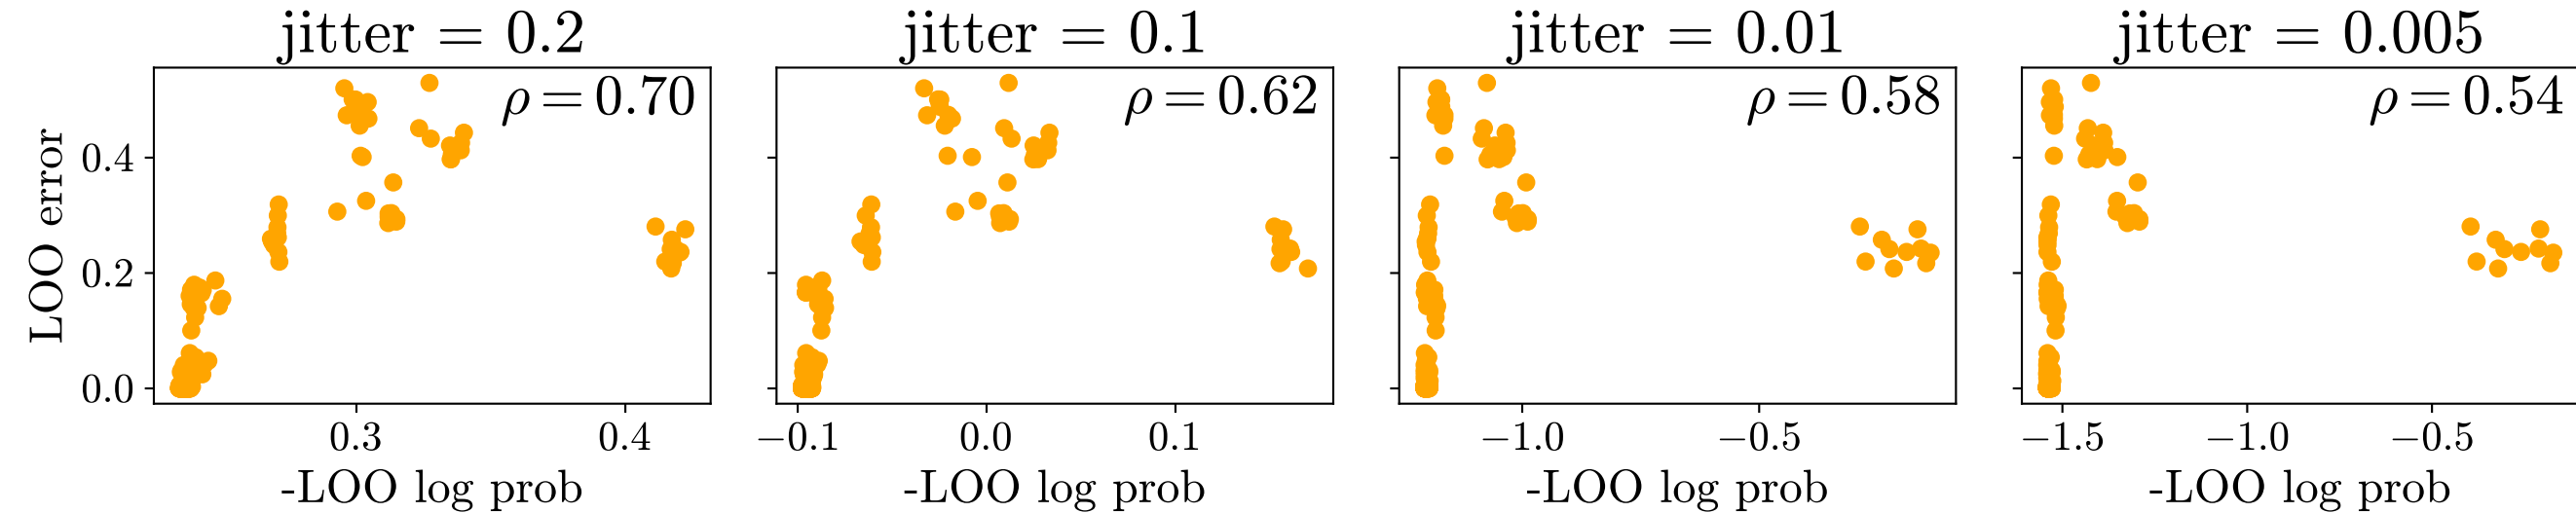

Supplement: supplementary_material [file attachment]

kin40k,  $r = -0.44$ 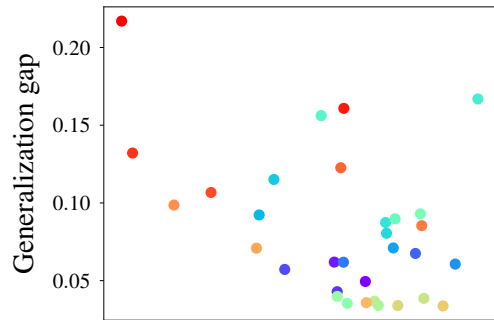autmpg,  $r = -0.34$ 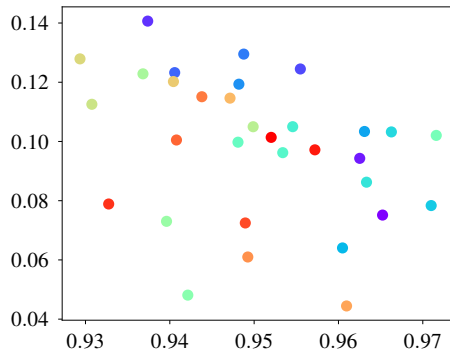pendulum,  $r = 0.19$ 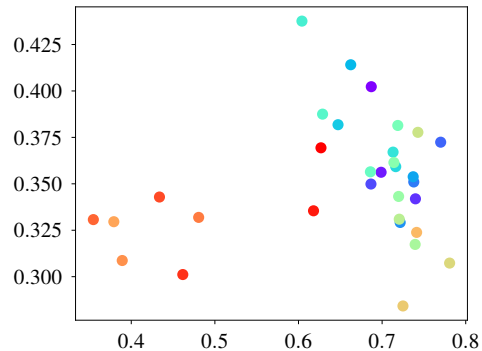protein,  $r = 0.50$ 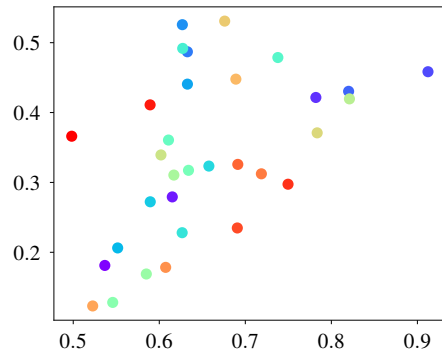airfoil,  $r = -0.50$ 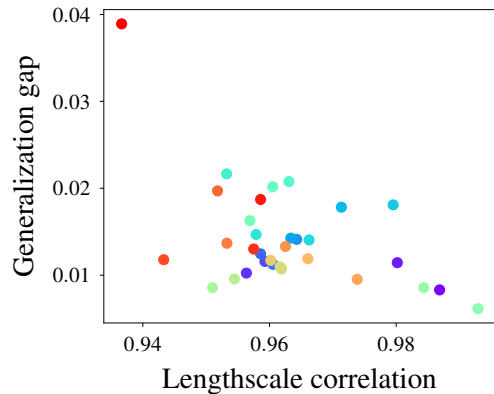song,  $r = -0.88$ 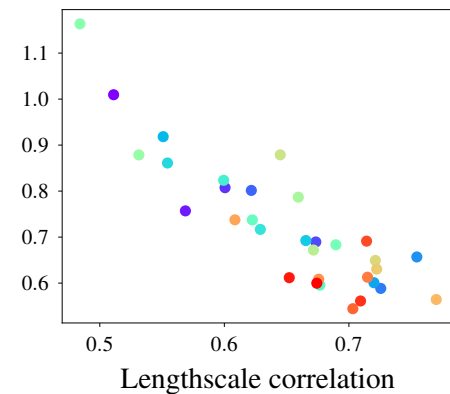pumadyn32nm,  $r = -0.71$ 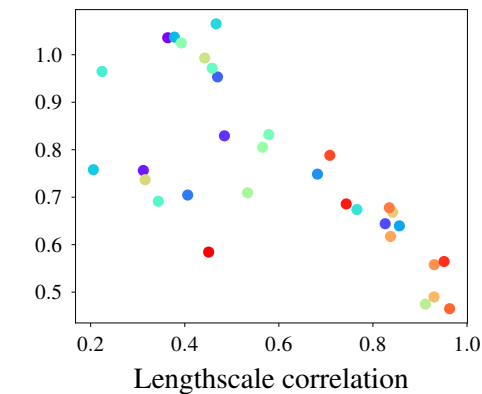

Supplement: supplementary_material [file attachment]

kin40k,  $r = -0.48$ 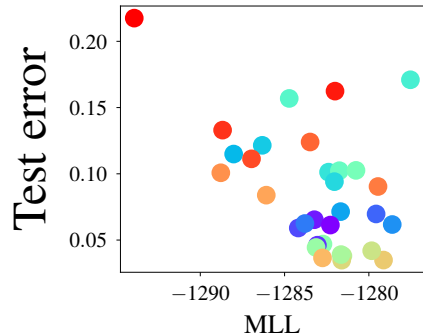autmpg,  $r = -0.72$ 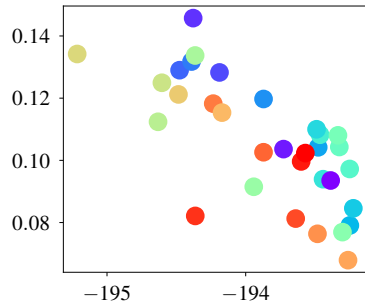airfoil,  $r = 0.41$ 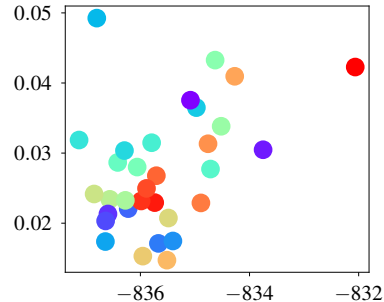protein,  $r = 0.62$ 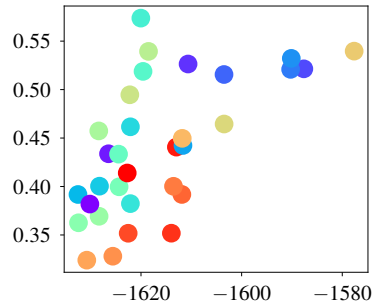pumadyn32nm,  $r = -0.27$  pendulum,  $r = -0.22$ 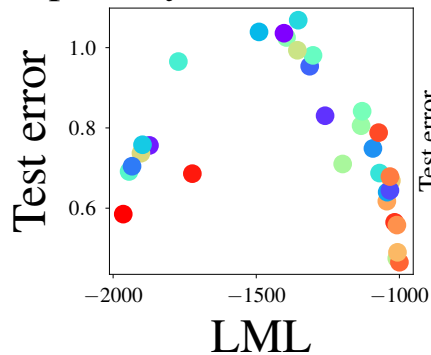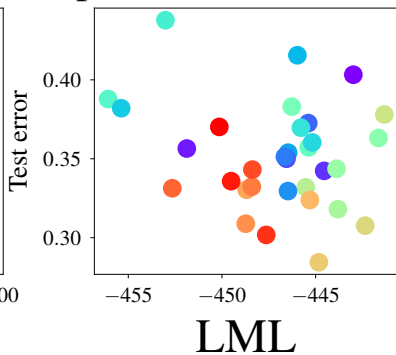song,  $r = -0.81$ 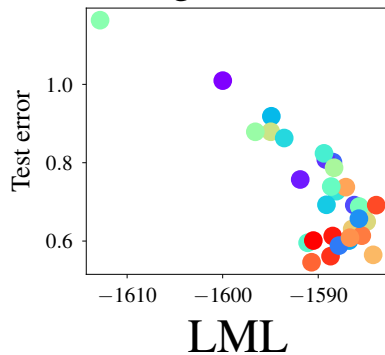

Supplement: supplementary_material [file attachment]

autompg,  $r = -0.72$ 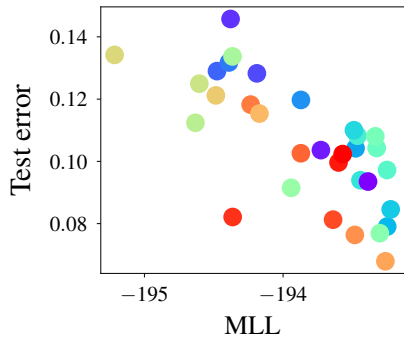pendulum,  $r = -0.22$ 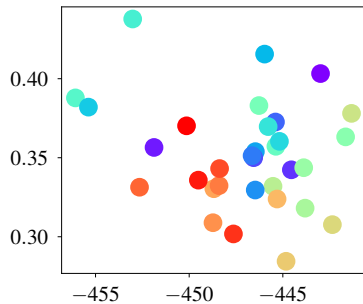kin40k,  $r = -0.48$ 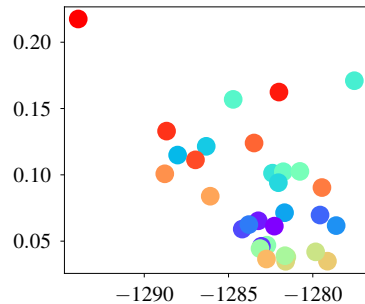airfoil,  $r = 0.41$ 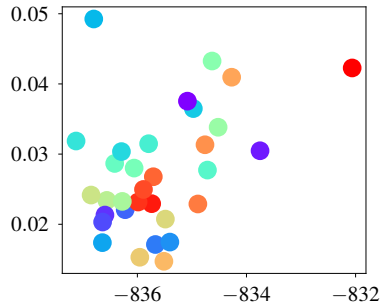pumadyn32nm,  $r = -0.27$ 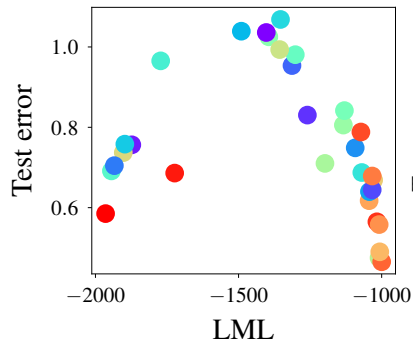song,  $r = -0.81$ 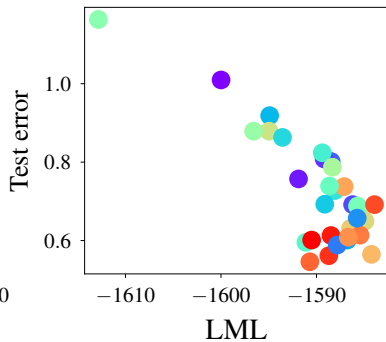protein,  $r = 0.62$ 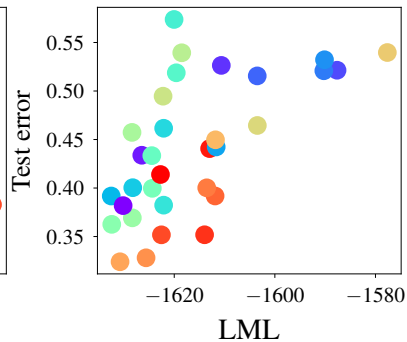

Supplement: supplementary_material [file attachment]

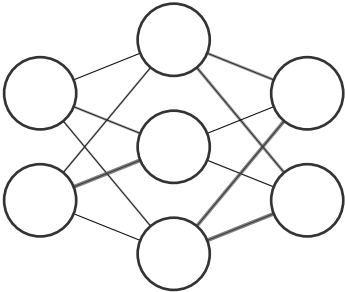

Supplement: supplementary_material [file attachment]

# NN predictions

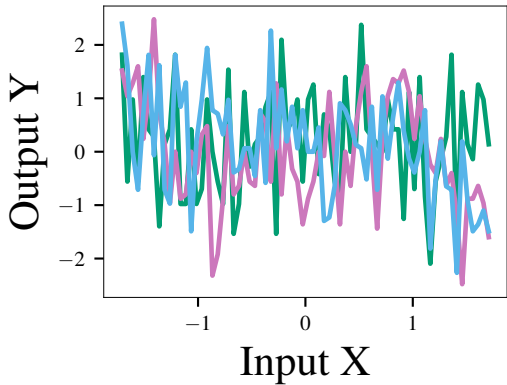

# Learned kernel

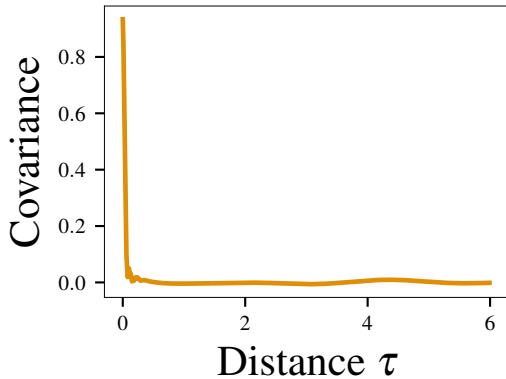

Supplement: supplementary_material [file attachment]
